# Supplementary material for: A multicentre non-blinded randomised controlled trial to assess the impact of regular early specialist symptom control treatment on quality of life in malignant mesothelioma (RESPECT-MESO): study protocol for a randomised controlled trial
Source: PubMed Central journal article supplement (PMC4180732; doi:10.1186/1745-6215-15-367), 2014-09-19

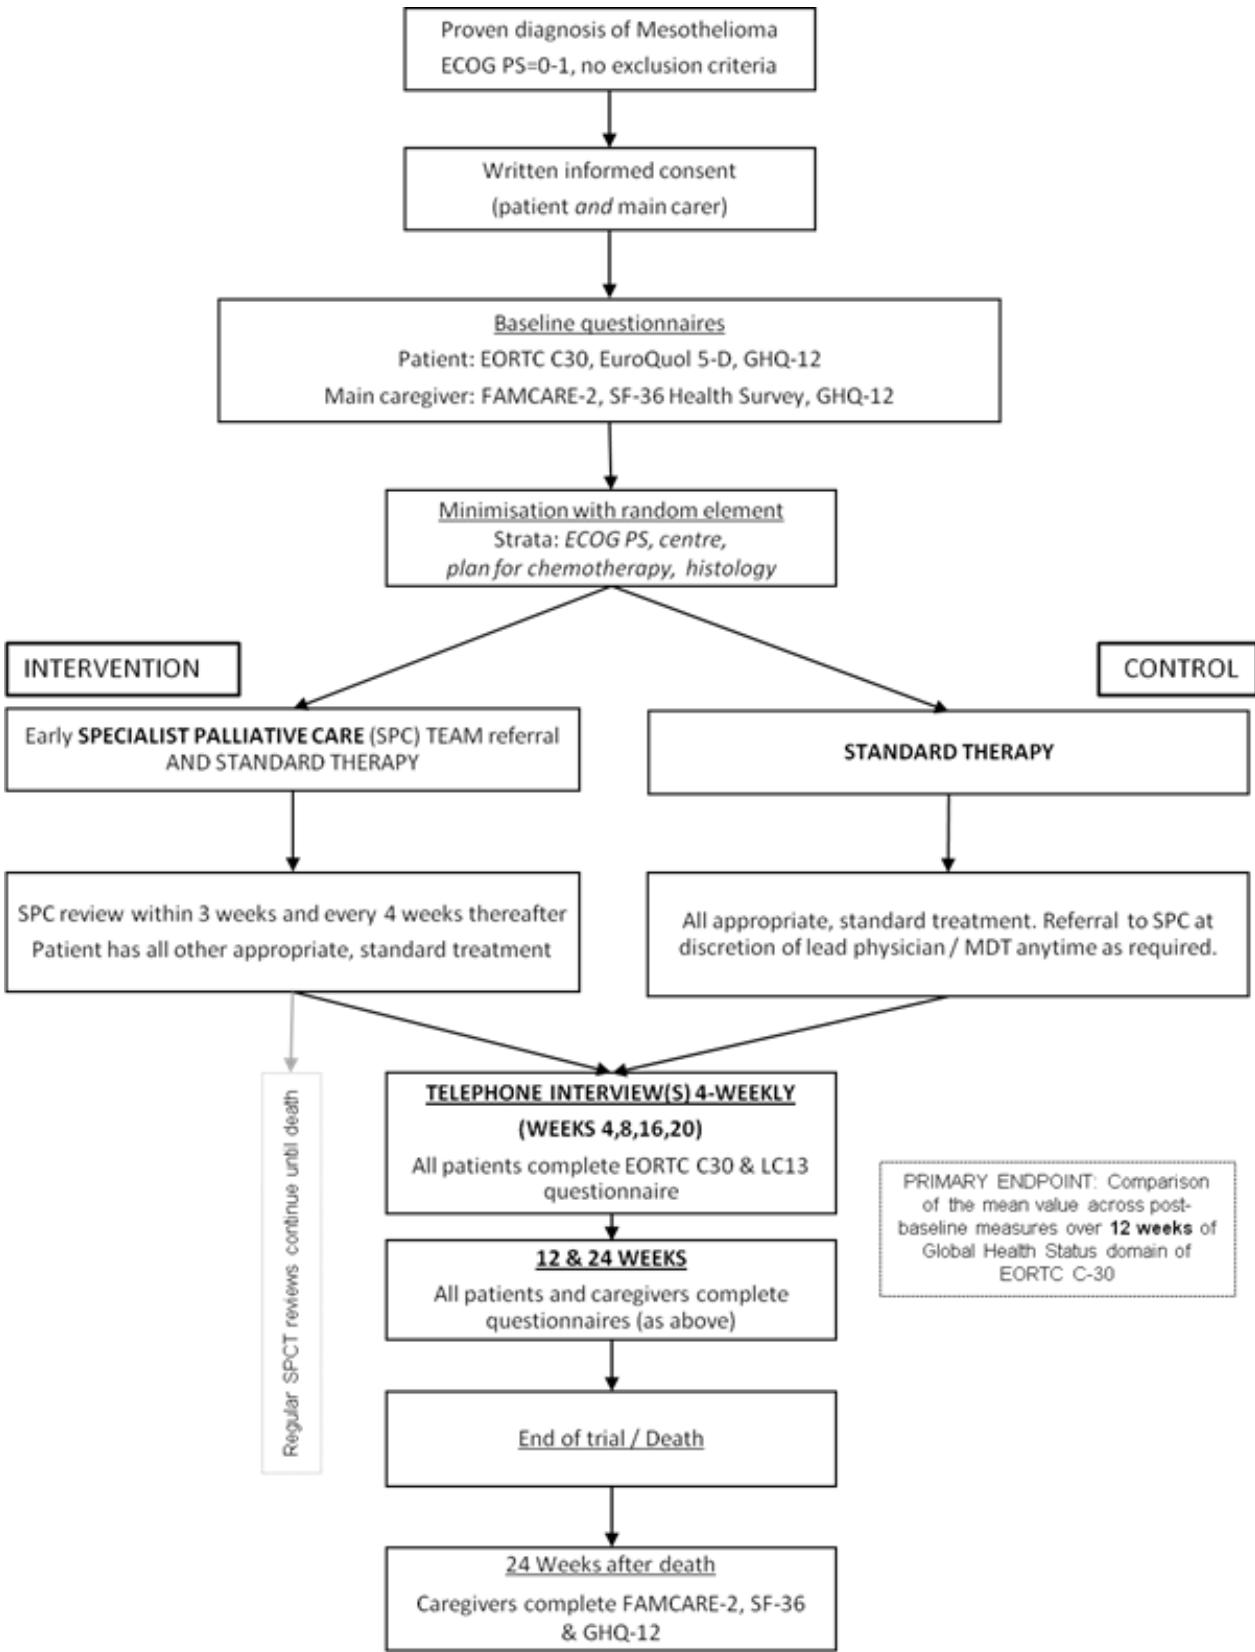

Supplement: 13063_2014_2238_MOESM1_ESM.pdf [file 13063_2014_2238_MOESM1_ESM.pdf]
